# Genetic variation in dispersal plasticity in an aquatic host-parasite model system

Giacomo Zilio<sup>1\*</sup>, Louise Solveig Nørgaard<sup>2</sup>, Giovanni Petrucci<sup>1</sup>, Nathalie Zeballos<sup>3</sup>,

Claire Gougat-Barbera<sup>1</sup> & Oliver Kaltz<sup>1</sup>

<sup>1</sup> ISEM, University of Montpellier, CNRS, EPHE, IRD, Montpellier, France.

<sup>2</sup> School of Biological Sciences, Monash University, Melbourne 3800, Australia.

<sup>3</sup> CEFE, University of Montpellier, CNRS, EPHE, IRD, Montpellier, France.

\*Corresponding author: [gcm.zilio@gmail.com](mailto:gcm.zilio@gmail.com)

## Abstract

Dispersal plays a main role in determining spatial dynamics, and both theory and empirical evidence indicate that evolutionary optima exist for constitutive or plastic dispersal behaviour. Plasticity in dispersal can be influenced by factors both internal (state-dependent) or external (context-dependent) to individuals. Parasitism is interesting in this context, as it can influence both types of host dispersal plasticity: individuals can disperse in response to internal infection status but might also respond to the presence of infected individuals around them. We still know little about the driving evolutionary forces of host dispersal plasticity, but a first requirement is the presence of a genetic basis on which natural selection can act. In this study, we used microcosm dispersal mazes to investigate plastic dispersal of 20 strains of the freshwater protist *Paramecium caudatum* in response to the bacterial parasite *Holospora undulata*. We additionally quantified the genetic component of the plastic responses, i.e. the heritability of state- and context-dependent dispersal. We found that infection by the parasite can either increase or decrease dispersal of individual strains relative to the uninfected (state-dependent plasticity), and this to be heritable. We also found strain-specific change of dispersal of uninfected *Paramecium* when exposed to variable infection prevalence (context-dependent plasticity) with very low level of heritability. To our knowledge, this is the first explicit empirical demonstration and quantification of genetic variation of plastic dispersal in a host-parasite system, which could have important implications for meta-population and epidemiological dynamics. We discuss some of the underlying mechanisms of this variation and link our results to the existing theoretical models.

## 30 Introduction

31 In recent years the study of dispersal has received an increasing interest (Bowler & Benton, 2005; Ronce,  
32 2007; Clobert *et al.*, 2009; Kubisch *et al.*, 2014). Understanding why animals move and disperse within a  
33 landscape has in fact become critical in a world driven by environmental changes (Parmesan & Yohe, 2003;  
34 Thomas *et al.*, 2004). Constitutive or plastic dispersal, broadly defined as the movement of individual  
35 between different habitat patches (Ronce, 2007), is a fundamental and complex trait driving metapopulation  
36 and spatial dynamics (Hanski & Hanski, 1999; Baguette *et al.*, 2012). Namely, plastic dispersal can be  
37 influenced by changes in the internal condition of the individual (state-dependent dispersal) or by  
38 environmental factors (context-dependent dispersal) (Clobert *et al.*, 2009).

39  
40 State-dependent dispersal depends on the phenotypic variation of single individuals, so that they will be  
41 more or less propense to disperse or even migrate (Narayanan *et al.*, 2020) because of their internal condition  
42 (Clobert *et al.*, 2009). Sex (Greenwood, 1980), body size (Hanski & Woiwod, 1993) and condition (Binning *et al.*  
43 *et al.*, 2017), and developmental stage (Bowler & Benton, 2005) can also play a role in influencing dispersal.  
44 Context-dependent dispersal is usually correlated to the environment the organisms live in. Here, individuals  
45 can decide to leave or stay in the patch by gathering information about the patch quality from some  
46 environmental cues characteristic of the patch itself (Clobert *et al.*, 2009; Fronhofer *et al.*, 2018). Cues may  
47 be linked to abiotic or spatial factors such as food availability (Massot & Clobert, 1995; Kim, 2000), patch  
48 isolation (Conradt *et al.*, 2001; Bowler & Benton, 2005) or patch size (Stamps *et al.*, 1987; Kindvall &  
49 Petersson, 2000), but also relate to biotic interactions (Kubisch *et al.*, 2014). Examples of these interactions  
50 are within species density (Harrison, 1980; Roland *et al.*, 2000; Poethke & Hovestadt, 2002; Bowler & Benton,  
51 2005; Rodrigues & Johnstone, 2014), sex ratio (Lawrence, 1987, 1988), relatedness (Ronce *et al.*, 2001) as  
52 well as between species dynamics (Poethke *et al.*, 2010). Despite their ubiquity and impact on demographic  
53 dynamics and evolution, still little is known about how the interaction with parasites and predators affects  
54 dispersal plasticity, and what the consequences might be for epidemiology and co-evolution of host and  
55 parasite (May & Anderson, 1983; Poethke *et al.*, 2010; Binning *et al.*, 2017). As such, parasites effect on  
56 dispersal is of particular interest since parasitism can simultaneously influence dispersal by state-dependent  
57 or context-dependent plasticity.

58  
59 State dependence is the simplest: the host can be either infected or uninfected, and thus the behaviour of  
60 the host can differ between infection status. The parasite can influence dispersal by changes in the host that  
61 can be morphological or physiological (Binning *et al.*, 2017). However, the outcome of the infection on  
62 dispersal behaviour is not straightforward. Parasites infections are usually costly and, as a consequence of  
63 host exploitation, they can decrease dispersal levels (Heeb *et al.*, 1999; Fellous *et al.*, 2011; Debeffe *et al.*,  
64 2014; Horiky *et al.*, 2014; Welicky & Sikkel, 2015; Norgaard *et al.*, 2019; Baines *et al.*, 2020). For example, the

65 freshwater fish *Squalius cephalus* parasitized by the larva of the bivalve *Anodonta anatine* show reduced  
66 movement and dispersal caused by an increased energetic demand in the immune system to fight off the  
67 infection (Horky *et al.*, 2014). Although considering the specific case of natal dispersal (i.e. dispersal from the  
68 natal to a non-overlapping adult range), a monitoring study of wild population of the roe deer *Capreolus*  
69 *capreolus*, found that parasite abundance of three different orders of worms (Strongylida, Trichocephalida,  
70 Ascaridida) reduced state-dependent dispersal (Debeffe *et al.*, 2014). Alternatively, dispersal behaviour can  
71 be positively correlated with infection (Brown & Brown, 1992; Suhonen *et al.*, 2010; Brown *et al.*, 2016; Shaw  
72 & Binning, 2016). For example, in the damselfly *Calopteryx virgo* (Suhonen *et al.*, 2010), males have been  
73 found to disperse more when the immune system was activated. Possibly, males need to forage more as a  
74 consequence of an activated immune system, and so they also move and disperse more in search for food.  
75 Other examples of increased dispersal can be found when parasites directly manipulate host behaviour to  
76 gain a fitness benefit (Curtis, 1993; Thomas *et al.*, 2002; Lion *et al.*, 2006; Martini *et al.*, 2015). The Asian  
77 citrus psyllid (*Diaphorina citri*) infected by *Candidatus Liberibacter asiaticus* show increased dispersal and  
78 parasite manipulated flight patterns (Martini *et al.*, 2015). Kin selection can also be a major driver in  
79 increasing dispersal. Individuals may leave their patch to prevent relatives to be infected, even if dispersal is  
80 not favoured by other conditions (Hamilton & May, 1977; Poethke *et al.*, 2010; Iritani & Iwasa, 2014; Iritani,  
81 2015; Deshpande *et al.*, 2020). In other cases, parasites do not seem to affect dispersal behaviour of their  
82 hosts (Mayer *et al.*, 2015; Nelson *et al.*, 2015; Csata *et al.*, 2017; Taggart *et al.*, 2018). In Australian Sleepy  
83 Lizards (*Tiliqua rugosa*) infected by ticks, dispersal is unaffected, potentially because *T. rugosa* has adapted  
84 to some level of parasite load in its natural system (Taggart *et al.*, 2018).

85  
86 Context-dependent dispersal can happen in response to the presence of natural threats in the population, as  
87 shown by theoretical (Poethke *et al.*, 2010) and empirical work (de la Peña & Bonte, 2014; Otsuki & Yano,  
88 2014). In a model for a predator-prey system, Poethke *et al.* (2010) predict that, for dispersal plasticity to be  
89 selected for, the presence or absence of predators need to have a high spatio-temporal correlation (i.e. the  
90 patch future conditions need to be highly predictable). In this way, the prey can take the appropriate  
91 “decision” to leave or stay in the patch. This condition is also found in a model considering host-parasite  
92 context-dependent plasticity (Deshpande *et al.*, 2020). A recent study analysing multiple taxa of invertebrates  
93 and vertebrates showed that chemical predator-related cues can induce dispersal, along with alterations in  
94 resource availability (Fronhofer *et al.*, 2018). It is likely that such cues are relevant also in host-parasite  
95 models, where strategies of infection-avoidance behaviour by uninfected individuals are well known  
96 (Behringer *et al.*, 2006; Beltran-Bech & Richard, 2014; Curtis, 2014; Lopes *et al.*, 2016; Stroeymeyt *et al.*,  
97 2018). However, empirical studies that explicitly consider host dispersal plasticity as a function of parasite  
98 density are rare (French & Travis, 2001).

99

100 Dispersal and dispersal-related traits have a genetic basis, as reviewed extensively by Saastamoinen *et al.*,  
101 2018, and they can rapidly evolve (Phillips *et al.*, 2006; Taylor & Buckling, 2011; Weiss-Lehman *et al.*, 2017;  
102 Zilio *et al.*, 2020). However, also plastic responses such as dispersal plasticity have a genetic basis underlined  
103 by additive genetic components which could respond to selection (de Jong, 2005; Pigliucci, 2005; Garland &  
104 Kelly, 2006; Laitinen & Nikoloski, 2019). Reinforcing this idea, a recent meta-analysis highlighted the crucial  
105 role of plasticity relative to genetic differentiation in determining phenotypic divergence between  
106 populations (Stamp & Hadfield, 2020). Thus, plastic level of dispersal can be expected to readily evolve in  
107 response to biotic pressures and environmental changes. To date, only very few studies have investigated  
108 whether this requirement is met for state- and context-dependent dispersal plasticity. In fact, how plastic  
109 dispersal varies between different genotypes due to a parasite challenge is rarely evaluated in empirical  
110 studies (Suhonen *et al.*, 2010; Fellous *et al.*, 2011), or the genetic diversity is treated as a random effect (Csata  
111 *et al.*, 2017). Also, the number of strains evaluated is usually small, making it difficult to draw any strong  
112 conclusion on the genetic component of plastic dispersal of infected hosts.

113

114 In this study, using microcosm dispersal mazes, 20 strains of *P. caudatum* were tested for dispersal in the  
115 presence and absence of its parasite, the bacterium *Holospora undulata*. From previous studies on this protist  
116 it was observed that parasitic infection reduces dispersal (Fellous *et al.*, 2011). The objective of this study  
117 was to test whether this negative effect was general, or whether strains varied in infection-state dependent  
118 dispersal. Variation in context dependency was investigated by comparing the dispersal of uninfected hosts  
119 over a range of population-level infection prevalence. Inspection of this natural variation in dispersal  
120 plasticity and the estimation of heritability, allowed us to make projections as to whether these traits may  
121 respond to parasite-mediated selection.

122

## 123 **Materials and methods**

### 124 **Study system**

125 *Paramecium caudatum* is a freshwater filter-feeding protist commonly found in stagnant waters of the  
126 Northern hemisphere (Wichterman, 2012). Like all ciliates, paramecia have a macronucleus for somatic gene  
127 expression and a germ-line micronucleus, used for sexual reproduction. *Holospora undulata* is a gram-  
128 negative alpha-proteobacterium that infects the micronucleus of *P. caudatum* (Fokin, 2004). It can be  
129 transmitted vertically when the host divides or horizontally at host death. Infectious spores are immobile and  
130 therefore rely on host movement or water current for their own dispersal. Infection reduces *P. caudatum*  
131 survival (Restif & Kaltz, 2006) and dispersal (Fellous *et al.*, 2011; Nørgaard *et al.*, 2020).

132

### 133 **Experimental procedure**

134 In this experiment we assessed dispersal of 20 strains of *P. caudatum* from different geographical regions

135 (provided by S. Krenek, TU Dresden, Germany; Table S1, Supplementary Information). Each strain was  
136 infected with an inoculum of *H. undulata*, prepared from a mix of infected stock cultures in the lab. All  
137 infections in these stock cultures originate from a single isolate of *H. undulata* established in 2001 and serves  
138 as the reference genome for this species (Dohra *et al.*, 2013). The 20 strains were grown as mass cultures  
139 and then divided into two blocks, each consisting of three assay replicates per strain (20 strains x 2 blocks x  
140 3 assay replicates = 120 replicates). Four days after infection, the prevalence of infected individuals in each  
141 population was measured to test if the infection by *H. undulata* had established in the tube. In parallel, three  
142 uninfected controls for each strain were maintained (total of 180 replicates). Using the methods described  
143 in Nørgaard *et al.* (2020), dispersal of infected and uninfected control replicates was tested three weeks post-  
144 infection, when population size (mean: 190 mL<sup>-1</sup> ± 9 SE; 95% range [172; 208]) and infection prevalence  
145 (mean: 26.8 % ± 2.1; 95% range [3.1; 90.7]) had settled naturally in each experimental replicate. Shortly, the  
146 dispersal arena consisted of three 50-mL Falcon tubes, one in the middle connected to two lateral tubes. The  
147 connection between tubes could be opened or closed by the experimenter. Each tube was filled with 25 mL  
148 of fresh medium so that both connections were established. The connections were then blocked and ~20 mL  
149 of culture containing infected or uninfected control were put in the middle tube. The lateral tubes received  
150 20 mL of *Paramecium*-free medium. Connections were then opened, and the *Paramecium* allowed to  
151 disperse to the lateral tubes. After 3h, the connections between tubes were closed. Samples were taken from  
152 the middle tube (500 µl) and the combined lateral tubes (3 mL). We then counted the number of individuals  
153 (dissecting microscope, 40x) and made lacto-aceto-orcein fixations (Görtz & Wiemann, 1989) of the  
154 *Paramecium* from infected replicates to determine their infection status (Phase contrast, 1000x). From the  
155 cell counts and the information on infection status, we estimated the total population density and infection  
156 prevalence (i.e., what was added to the middle tube at the beginning of the assay), as well as the proportion  
157 of infected and uninfected dispersers for each replicate (referred to as per-3h 'dispersal rate' or dispersal,  
158 hereafter). Furthermore, a swimming behaviour assay was performed. From each strain (infected and control  
159 replicates), 1 infected and 1 uninfected individual were isolated, and then grown in a 2mL Eppendorf for 8  
160 days. The resulting 40 monoclonal cultures (20 strains x 2 infection status) were then checked to confirm the  
161 infection status. Swimming behaviour was assayed by placing 200-µL samples (containing 10-20 individuals)  
162 on a microscope slide and recording individual movement trajectories (Perfex SC38800 camera; 15 frames  
163 per second; duration 10 s). For each sample, average swimming speed (µm/s) and swimming tortuosity  
164 (standard deviation of the turning angle distribution, describing the extent of swimming trajectory change)  
165 were determined using video analysis with the "BEMOVI" package (Pennekamp *et al.*, 2015).

166

## 167 **Statistical analysis**

168 All the statistical analysis was conducted in R version 3.6.3 (R Core Team, 2019). To analyse variation in  
169 dispersal we used generalized linear mixed effect models (GLMMs) with binomial error distribution (logit

170 link) of the “lme4” (Bates *et al.*, 2015) and “car” (Fox & Weisberg, 2019) package.

171 For state-dependent dispersal, we compared the dispersal of the infected fraction (from infected replicates)

172 with the dispersal in the uninfected control replicates. Using the completely uninfected control replicates as

173 the reference (rather than the uninfected fraction in infected replicates) avoided any confounding effects

174 that may arise from context-dependent dispersal of uninfected individuals in the infected tubes. The

175 explanatory fixed factors were *Paramecium* strain identity, infection status (infected or uninfected control)

176 and the strain x infection status interaction. Experimental block was considered as random factor. An overall

177 effect of state-dependent plasticity would be indicated by a significant effect of infection status, and the

178 genetic basis for plasticity by a significant strain x infection status interaction.

179 For context-dependent dispersal, we analysed the dispersal of uninfected *Paramecium* from the infected

180 replicates. One strain (C105) was removed due to the lack of replication. The explanatory fixed factors were

181 strain identity, infection prevalence and the strain x infection prevalence interaction. A significant effect of

182 infection prevalence would indicate general context-dependent dispersal plasticity, while a significant strain

183 x infection prevalence interaction would indicate genetic variation in this plasticity. Finally, we also added

184 population density as a covariate to take into account this potential additional type of context-dependency

185 (Fellous *et al.*, 2012; Deshpande *et al.*, 2020), and we considered experimental block as random factor. We

186 excluded 11 replicates from the state- and context-dependent analysis because no infection was detected.

187

188 We quantified the heritability of our traits of interest using the following procedure for both state- and

189 context-dependent dispersal (two identical, independent analysis). Given the non-Gaussian nature of the

190 traits and to do not overestimate heritability, we chose a Bayesian framework to run the quantitative genetic

191 models (de Villemereuil *et al.*, 2016, 2018). We used the “MCMCglmm” package (Hadfield, 2010) with

192 binomial variable distribution. To obtain variance component estimates, state- and context-dependent

193 dispersal variance was partitioned into four and five random effects respectively, corresponding to the

194 explanatory factors of our GLMMs. The MCMC chains were run over 1 million iterations (initial burning =

195 10.000 iterations, thinning = 1000 iterations), and to obtain posterior distribution estimates from the data

196 (Morrissey *et al.*, 2014) we specified parameter expanded priors ( $V = 1$ ,  $\nu = 0.02$ ). From the obtained values,

197 we used the specifically designed “QGparams” function for non-Gaussian traits in the “QGglmm” package (de

198 Villemereuil *et al.*, 2016) and calculated narrow sense heritability of the plastic response from the formula  $h^2$

199  $= V_A / V_P$ . Heritability corresponded to the relative contribution of the additive genetic variance of the

200 interaction term (i.e.  $V_A$ ; strain x infection status interaction for the state-, and strain x infection prevalence

201 interaction for the context-dependent dispersal) to the sum of all variance components ( $V_P$ ).

202

203 The data from the video analysis were used to link behavioural traits to observed levels of dispersal. First, we

204 ran two separate multiple linear regressions to test if the measured behavioural traits (average swimming



205 speed and average swimming tortuosity) varied as a function of strains and status. Second, we tested for  
206 correlations between these two swimming traits and mean dispersal (observed for each strain x infection  
207 status combination). Only 17 of the 20 strains were analysed due to isolated replicates not reproducing and  
208 thus missing data.

209

## 210 **Results**

### 211 **State-dependent dispersal**

212 We observed strong differences in state-dispersal among strains ( $\chi^2 = 133.2$ ,  $df = 19$ ,  $p < 0.001$ ), ranging from  
213 1% (SE  $\pm$  0.003) to 33% (SE  $\pm$  0.03). The analysis further revealed a marginally significant effect of infection  
214 status ( $\chi^2 = 2.9$ ,  $df = 1$ ,  $p = 0.086$ ), even though the overall levels of infected and uninfected dispersal were  
215 very similar (average infected: 13.4 % SE  $\pm$  2.4; average uninfected control: 12.0 % SE  $\pm$  2.7). We found a  
216 genetic basis for state-dependent dispersal with the strains having different levels of plasticity in response to  
217 the infection (Figure 1A). The interaction between strain and infection status on dispersal was indeed highly  
218 significant ( $\chi^2 = 64.7$ ,  $df = 1$ ,  $p < 0.001$ ). Confirming how such plastic response in state-dependent dispersal  
219 could respond to selection and evolve, the heritability of the interaction between strain and status was 8.58%  
220 (95 % CI [0.0006; 0.17103]) and explained almost a third of the model variance ( $r^2 = 0.32$ ). The differences in  
221 dispersal between uninfected control and infected groups in Figure 1B highlights how parasite infection had  
222 different effects depending on the strain, and therefore the genetic identity of the host. In 4 out of the 20  
223 strains, infection and dispersal were clearly negatively correlated (Figure 1B, strains above 0 on the left having  
224 higher dispersal when uninfected than infected). For three strains, infection and dispersal were clearly  
225 positively correlated, while strains overlapping 0 (Figure 1B) show little to no difference in state-dependent  
226 dispersal plasticity.

227

### 228 **Context-dependent dispersal**

229 The strains had significant differences in their context-dependent dispersal levels ( $\chi^2 = 94.7$ ,  $df = 18$ ,  $p <$   
230  $0.001$ ), which ranged from 2% (SE  $\pm$  0.04) to 38% (SE  $\pm$  0.01). However, the strains reacted differently across  
231 infection prevalence gradients (infection prevalence x strain interaction:  $\chi^2 = 28.9$ ,  $df = 18$ ,  $p = 0.049$ ), with  
232 either higher or lower dispersal at increased level of infection in the population, as showed by the different  
233 slopes in Figure 2A and 2B. Although marginally significant, the interaction term explained 23% of the model  
234 variance and had a very low heritability ( $h^2 < 0.001$ , 95% CI [ $10^{-7}$ ,  $10^{-4}$ ]). Neither the main effect of infection  
235 prevalence ( $\chi^2 = 0.9$ ,  $df = 1$ ,  $p = 0.348$ ) nor population density ( $\chi^2 = 0.5$ ,  $df = 1$ ,  $p = 0.497$ ) affected the dispersal  
236 of uninfected *Paramecium*; adding or removing this latter term from the model did not change the results  
237 ( $\chi^2 = 0.45$ ,  $df = 1$ ,  $p = 0.497$ ).

238

239

## 240 **Swimming behaviour**

241 Analysis of swimming speed revealed a significant effect of strain identity ( $F_{16,16} = 2.5$ ,  $p = 0.038$ ) and infection  
242 status ( $F_{1,16} = 40$ ,  $p < 0.001$ ). Namely, mean swimming speed was higher in uninfected control groups (mean  
243  $677 \mu\text{m s}^{-1}$ ,  $\pm 238$  SE) compared to infected ( $360 \mu\text{m s}^{-1}$ ,  $\pm 135$  SE) (Figure 3). Swimming tortuosity was not  
244 significantly affected by strain or infection status ( $p > 0.5$ ). Neither swimming speed ( $F_{1,31} = 0.53$ ,  $p = 0.47$ )  
245 nor swimming tortuosity ( $F_{1,31} = 0.51$ ,  $p = 0.48$ ) were good predictors of dispersal.

246

## 247 **Discussion**

248 Here, we investigated the amount of dispersal plasticity and its genetic basis in an experimental host-parasite  
249 model system. We found that different host strains express different levels of both state- and context-  
250 dependent dispersal in response to parasite infection and parasite prevalence in the population. In other  
251 terms, the correlation of dispersal plasticity with the infection status or infection prevalence depended on  
252 the host strain. Interestingly, state-dependent dispersal showed significant additive genetic variance and  
253 heritability, whereas context-dependent dispersal had a low genetic component. These results indicate a  
254 genetic basis for parasite-related dispersal plasticity that could be selected upon. This may lead to the  
255 evolution of complex dispersal phenotypes and reaction norms, with overall consequences for patterns of  
256 local adaptation, epidemiology and metapopulation dynamics.

257

### 258 **State-dependent plasticity**

259 In our analysis we observed that the dispersal outcome was affected by the identity of the host strains (Figure  
260 1A-B). Previous studies reported that infection by *H. undulata* reduced dispersal in *P. caudatum* (Fellous *et al.*,  
261 2011; Nørgaard *et al.*, 2020), which was related to a reduction in survival and reproduction. The  
262 explanation for a reduced dispersal can easily be connected to the negative effect that a parasite may have  
263 on its host locomotory ability (Horky *et al.*, 2014; Binning *et al.*, 2017). Infection may cause direct mechanical  
264 and physiological damage to its host (virulence). In fact, the host has to face the energetic demand of  
265 mounting an immune response and clear (or resist) the infection, reducing the potential to disperse. Further,  
266 the parasite may steal host resources (Mideo, 2009), and dispersal may become more costly (Lopes, 2014;  
267 McElroy & Buron, 2014; Risely *et al.*, 2018). The observed positive correlation of some strain is less intuitive.  
268 The theoretical model of Deshpande *et al.* (2020), predicts that positive parasite induced state-dependent  
269 dispersal can evolve as a consequence of kin selection. Dispersal of infected individuals is promoted to  
270 prevent relatives to be affected. Also, we cannot exclude that increased dispersal is a consequence of parasite  
271 manipulation to enhance its own growth, reproduction and transmission (Lion *et al.*, 2006; Martini *et al.*,  
272 2015; Binning *et al.*, 2017). Higher level of host dispersal may allow the parasite to infect not only at the local  
273 scale, but also to encounter new suitable habitats and host populations and spread globally (Kamo & Boots,  
274 2006). Still, we do not know whether the plasticity we observed is an adaptive response.



275 **Context-dependent plasticity**

276 In a recent meta-experiment, Fronhofer et al. (2018) demonstrated that context-dependent dispersal is  
277 driven by chemical predator signals in various organisms, including *P. caudatum*. It is therefore reasonable  
278 to think that this applies to infection-driven context-dependent dispersal in this system, in line with our  
279 results. However, similarly to the state-dependent analysis, the effect of infection prevalence on dispersal  
280 was strain specific, with a small number of strains showing a negative response to infection prevalence. This  
281 highlight the presence of a genetic basis for context-depend dispersal. Theoretical models (Deshpande *et al.*,  
282 2020; Poethke *et al.*, 2010) predict that, for the prey or parasite to make the appropriate “dispersal decision”  
283 to leave or stay in the patch, there needs to be high predictability about the environmental future conditions.  
284 More specifically, in a host-parasite system, prevalence could be a good predictor of a patch future condition  
285 only at high parasite virulence (Deshpande *et al.*, 2020). In our system, *Holospira undulata* generally reduces  
286 survival and reproductive success of *P. caudatum* (Restif & Kaltz, 2006; Nørgaard *et al.*, 2020), which is also  
287 reflected by differences in population density between uninfected control and infected microcosms in the  
288 present experiment (density uninfected control: 288 mL<sup>-1</sup>, ± 103; infected: 139 mL<sup>-1</sup>, ± 91 SE). Hence, we  
289 might speculate that some strains could have had an evolutionary history with a highly virulent parasite in  
290 the wild. Population density is considered one of the most prominent cues for context-dependent dispersal  
291 (Harrison, 1980; Bowler & Benton, 2005; Rodrigues & Johnstone, 2014), and density may even be used as a  
292 proxy cue for infection prevalence (Deshpande et al 2020). For example, a high infection prevalence in a  
293 patch may be expected to be associated with low density, and *vice versa*, making density a "mirror cue" of  
294 prevalence. Population density has been also reported to influence dispersal in *P. caudatum* (Fellous *et al.*,  
295 2012). However, in our study we did not find evidence for such density dependence. More controlled  
296 experimental setups may be employed to elucidate this question, with artificially manipulated infection  
297 prevalence and host densities (via controlled mixing of infected and uninfected individuals prior to dispersal,  
298 for example along a prevalence and/or density gradient). To investigate in more detail the underlying nature  
299 of the dispersal cue, we may envisage the use of filtered parasite inocula, in order to leave only potential  
300 chemical cues to influence the dispersal decision of *Paramecium* (see Fronhofer *et al.*, 2018).

301

302 **Swimming behaviour**

303 We observed reduced swimming speed in the infected groups (Figure 3), which is a frequently observed  
304 outcome of parasitic infections (McElroy & Buron, 2014; Binning *et al.*, 2017). In *P. caudatum*, a negative  
305 correlation between speed and dispersal has been previously observed (Zilio *et al.*, 2020). Reduced speed  
306 could also have the side effect of reducing predator avoidance. However, we did not observe any clear  
307 correlation between dispersal and swimming speed or tortuosity in our study. Thus, it is difficult to infer any  
308 clear mechanistic explanation for the different dispersal rates measured. It is possible that we did not  
309 consider some other aspect of swimming behaviour that may be influenced by the presence of *H. undulata*.

310 For example, some parasites are known to affect the position of its host in the water column (Cezilly *et al.*,  
311 2000). Although this is yet to be formally tested in this system, this could have influenced the ability of *P.*  
312 *caudatum* to find the connection corridor between the test tubes in the dispersal arena.

313

#### 314 **Is plasticity selected for?**

315 We observed genetic variation in both state-dependent and context-dependent dispersal plasticity, however  
316 context-dependent dispersal presented low heritability compared to state-dependent. Under parasite-  
317 mediated selection, we may therefore expect little evolutionary response of context- compared to state-  
318 dependent dispersal. Only state-dependent dispersal seems to have the genetic potential for the evolution  
319 of plastic dispersal phenotypes and reaction norms.

320

321 Heritability values range broadly in wild and laboratory populations (Mousseau & Roff, 1987; Weigensberg  
322 & Roff, 1996; McFarlane *et al.*, 2014; Salles *et al.*, 2020). The low estimated value of context-depend dispersal  
323 may reflect different causes apart from low additive genetic variance, large environmental or residual effects.  
324 If the trait is linked to fitness (avoiding the risk of infection), directional selection is expected to erode genetic  
325 variation with corresponding low heritability (Kruuk *et al.*, 2000). Thus, the trait may have already been  
326 selected under different circumstances (e.g. high or low parasite prevalence), leading to the observed  
327 pattern. Alternatively, low heritability may occur when the trait has a complex genetic architecture, as it is  
328 likely for context-depend dispersal which includes many physiological and behavioural components. As a  
329 result, the co-variation of additive genetic and residual variance may suffer from a lack of power and limit  
330 direct effects on heritability (Stirling *et al.*, 2002). Genetic architecture can influence evolutionary outcomes  
331 (Holloway *et al.*, 1990), and the effect of a parasite on the host could also depend on its past evolutionary  
332 history. Evolved resistance or tolerance to some level of parasitic infection can explain why, in some cases,  
333 we do not see any effect of infection on dispersal (Taggart *et al.*, 2018). In our data, we have an estimate of  
334 resistance in the form of parasite prevalence at 4 days after infection (Table S1). However, it seems that there  
335 is no correlation between resistance and the difference in dispersal (data not shown). Yet, the strains that  
336 we used in our analysis come from many different geographical regions (Table S1), and there might be some  
337 aspects that we are unaware of, that cause some strains to be less subject to the effect of parasite infection  
338 on dispersal. Seminal work on our *Paramecium-Holospora* system illustrated the presence of different  
339 compatibilities between parasite isolate and host clones (Skoblo *et al.*, 1996), and the potential for variation  
340 and evolution of resistance. Still, as mentioned before, explanation different from an adaptive perspective  
341 might apply.

342

343 Understanding the possible trade-offs between dispersal plasticity and other traits could be crucial to predict  
344 plasticity evolution. In fact, plasticity seems to be more important (twice as much) compared to genetic

345 differentiation in causing adaptive phenotypic and spatial divergence between populations (Stamp &  
346 Hadfield, 2020). Also, the absolute values of dispersal and plasticity could play a role in determining  
347 evolutionary outcomes; individuals with high plasticity but low dispersal could be disadvantaged against a  
348 parasite, while individuals with high dispersal but low plasticity could be favoured. On an epidemiological  
349 side, different plasticity levels could influence disease spatial dynamics. This may lead to non-intuitive  
350 predictions and feedbacks, as shown by Deshpande et al (2020).

351

## 352 **Conclusions**

353 Dispersal is crucial in determining patterns of local adaptation, epidemiology and metapopulation dynamics  
354 (Hamilton & May, 1977; Hanski & Hanski, 1999; Ronce *et al.*, 2001; Baguette *et al.*, 2012). In this study we  
355 showed genetic variation in both state-dependent and context-dependent parasite-driven dispersal  
356 plasticity, with the two traits potentially under selection. However, we do not know how much of the  
357 observed variation between our strains is adaptive. An interesting follow up study could be to test how  
358 plasticity changes after the strains experience different selective pressures. Further work is needed to help  
359 better comprehend the main drivers of plasticity, especially for context-dependent dispersal, which, in host-  
360 parasite systems, remains poorly understood. Our study provides the first empirical demonstration of the  
361 genetic basis of dispersal plasticity in a host-parasite system.

362

## 363 **Acknowledgements**

364 This work was funded by the Swiss National Science Foundation (grant no. P2NEP3\_184489) to GZ and by  
365 the 2019 Godfrey Hewitt Mobility Award granted to LN by ESEB.

366 This is publication ISEM-YYYY-XXX of the Institut des Sciences de l'Evolution - Montpellier.

## 367 **Author contributions**

368 GZ, LN, NZ and OK conceived the study. GZ, LN, NZ, CGB and OK performed the experimental work. GZ, GP,  
369 and OK performed the statistical analysis. All authors interpreted the results. GZ, GP and OK wrote the first  
370 draft of the manuscript and all authors commented on the final version.

## 371 **Competing interests**

372 The authors declare no competing financial interests.

373

374

375

376

377 **References**

- 378 Baguette, M., Benton, T.G. & Bullock, J.M. 2012. *Dispersal Ecology and Evolution*. Oxford University Press.
- 379 Baines, C.B., Diab, S. & McCauley, S.J. 2020. Parasitism Risk and Infection Alter Host Dispersal. *Am. Nat.* 000–  
380 000. The University of Chicago Press.
- 381 Bates, D., Mächler, M., Bolker, B. & Walker, S. 2015. Fitting Linear Mixed-Effects Models Using lme4. *J. Stat.*  
382 *Softw.* 67: 1–48.
- 383 Behringer, D.C., Butler, M.J. & Shields, J.D. 2006. Avoidance of disease by social lobsters. *Nature* 441: 421–  
384 421. Nature Publishing Group.
- 385 Binning, S.A., Shaw, A.K. & Roche, D.G. 2017. Parasites and Host Performance: Incorporating Infection into  
386 Our Understanding of Animal Movement. *Integr. Comp. Biol.* 57: 267–280. Oxford Academic.
- 387 Bowler, D.E. & Benton, T.G. 2005. Causes and consequences of animal dispersal strategies: relating individual  
388 behaviour to spatial dynamics. *Biol. Rev.* 80: 205–225.
- 389 Brown, C.R. & Brown, M.B. 1992. Ectoparasitism as a Cause of Natal Dispersal in Cliff Swallows. *Ecology* 73:  
390 1718–1723.
- 391 Brown, G.P., Kelehear, C., Pizzatto, L. & Shine, R. 2016. The impact of lungworm parasites on rates of dispersal  
392 of their anuran host, the invasive cane toad. *Biol. Invasions* 18: 103–114.
- 393 Cezilly, F., Gregoire, A. & Bertin, A. 2000. Conflict between co-occurring manipulative parasites? An  
394 experimental study of the joint influence of two acanthocephalan parasites on the behaviour of  
395 *Gammarus pulex*. *Parasitology* 120: 625–630. Cambridge University Press.
- 396 Clobert, J., Galliard, J.-F.L., Cote, J., Meylan, S. & Massot, M. 2009. Informed dispersal, heterogeneity in  
397 animal dispersal syndromes and the dynamics of spatially structured populations. *Ecol. Lett.* 12: 197–  
398 209.
- 399 Conradt, L., Roper, T.J. & Thomas, C.D. 2001. Dispersal behaviour of individuals in metapopulations of two  
400 British butterflies. *Oikos* 95: 416–424.
- 401 Csata, E., Bernadou, A., Rakosy-Tican, E., Heinze, J. & Marko, B. 2017. The effects of fungal infection and  
402 physiological condition on the locomotory behaviour of the ant *Myrmica scabrinodis*. *J. Insect.*  
403 *Physiol.* 98: 167–172.
- 404 Curtis, L.A. 1993. Parasite transmission in the intertidal zone: Vertical migrations, infective stages, and snail  
405 trails. *J. Exp. Mar. Biol. Ecol.* 173: 197–209.
- 406 Curtis, V.A. 2014. Infection-avoidance behaviour in humans and other animals. *Trends Immunol.* 35: 457–  
407 464.
- 408 de Jong, G. 2005. Evolution of phenotypic plasticity: patterns of plasticity and the emergence of ecotypes.  
409 *New Phytol.* 166: 101–117.

- 410 de la Peña, E. & Bonte, D. 2014. Above- and belowground herbivory jointly impact defense and seed dispersal  
411 traits in *Taraxacum officinale*. *Ecol. Evol.* 4: 3309–3319. John Wiley & Sons, Ltd.
- 412 de Villemereuil, P., Morrissey, M.B., Nakagawa, S. & Schielzeth, H. 2018. Fixed-effect variance and the  
413 estimation of repeatabilities and heritabilities: issues and solutions. *J. Evol. Biol.* 31: 621–632.
- 414 de Villemereuil, P., Schielzeth, H., Nakagawa, S. & Morrissey, M. 2016. General Methods for Evolutionary  
415 Quantitative Genetic Inference from Generalized Mixed Models. *Genetics* 204: 1281–1294.
- 416 Debeffe, L., Morellet, N., Verheyden-Tixier, H., Hoste, H., Gaillard, J.-M., Cargnelutti, B., *et al.* 2014. Parasite  
417 abundance contributes to condition-dependent dispersal in a wild population of large herbivore.  
418 *Oikos* 123: 1121–1125.
- 419 Deshpande, J.N., Kaltz, O. & Fronhofer, E.A. 2020. Host-parasite dynamics set the ecological theatre for the  
420 evolution of state- and context-dependent dispersal in hosts. *bioRxiv* 2020.04.03.022962.
- 421 Dohra, H., Suzuki, H., Suzuki, T., Tanaka, K. & Fujishima, M. 2013. Draft Genome Sequence of *Holospira*  
422 *undulata* Strain HU1, a Micronucleus-Specific Symbiont of the Ciliate *Paramecium caudatum*.  
423 *Genome Announc.* 1.
- 424 Fellous, S., Duncan, A., Coulon, A. & Kaltz, O. 2012. Quorum Sensing and Density-Dependent Dispersal in an  
425 Aquatic Model System. *PLoS ONE* 7. Public Library of Science.
- 426 Fellous, S., Quillery, E., Duncan, A.B. & Kaltz, O. 2011. Parasitic infection reduces dispersal of ciliate host. *Biol.*  
427 *Lett.* 7: 327–329.
- 428 Fokin, S.I. 2004. Bacterial endocytobionts of ciliophora and their interactions with the host cell. *Int. Rev. Cytol.*  
429 236: 181–250. New York, NY: Academic Press, 1952-.
- 430 Fox, J. & Weisberg, S. 2019. An R Companion to Applied Regression, Third edition. Sage, Thousand Oaks CA
- 431 French, D. & Travis, J. 2001. Density-dependent dispersal in host-parasitoid assemblages. *Oikos* 95: 125–135.
- 432 Fronhofer, E.A., Legrand, D., Altermatt, F., Ansart, A., Blanchet, S., Bonte, D., *et al.* 2018. Bottom-up and top-  
433 down control of dispersal across major organismal groups. *Nat. Ecol. Evol.* 2: 1859–1863. Nature  
434 Publishing Group.
- 435 Garland, T. & Kelly, S.A. 2006. Phenotypic plasticity and experimental evolution. *J. Exp. Biol.* 209: 2344–2361.
- 436 Görtz, H.-D. & Wiemann, M. 1989. Route of infection of the bacteria *Holospira elegans* and *Holospira obtusa*  
437 into the nuclei of *Paramecium caudatum*. *Eur. J. Protistol.* 24: 101–109.
- 438 Greenwood, P.J. 1980. Mating systems, philopatry and dispersal in birds and mammals. *Anim. Behav.* 28:  
439 1140–1162.
- 440 Hadfield, J.D. 2010. MCMC Methods for Multi-Response Generalized Linear Mixed Models: The MCMCglmm  
441 R Package. *J. Stat. Softw.* 33: 1–22.

- 442 Hamilton, W.D. & May, R.M. 1977. Dispersal in stable habitats. *Nature* 269: 578–581. Nature Publishing  
443 Group.
- 444 Hanski, I. & Hanski, P. in the D. of E. and S.I. 1999. *Metapopulation Ecology*. OUP Oxford.
- 445 Hanski, I. & Woiwod, I.P. 1993. Spatial Synchrony in the Dynamics of Moth and Aphid Populations. *J. Anim.*  
446 *Ecol.* 62: 656–668. [Wiley, British Ecological Society].
- 447 Harrison, R.G. 1980. Dispersal Polymorphisms in Insects. *Annu. Rev. Ecol. Syst.* 11: 95–118.
- 448 Heeb, P., Werner, I., Mateman, A.C., Kölliker, M., Brinkhof, M.W.G., Lessells, C.M., *et al.* 1999. Ectoparasite  
449 infestation and sex-biased local recruitment of hosts. *Nature* 400: 63–65. Nature Publishing Group.
- 450 Holloway, G.J., Povey, S.R. & Sibly, R.M. 1990. The effect of new environment on adapted genetic  
451 architecture. *Heredity* 64: 323–330. Nature Publishing Group.
- 452 Horky, P., Douda, K., Maciak, M., Zavorka, L. & Slavik, O. 2014. Parasite-induced alterations of host behaviour  
453 in a riverine fish: the effects of glochidia on host dispersal. *Freshw. Biol.* 59: 1452–1461.
- 454 Iritani, R. 2015. How parasite-mediated costs drive the evolution of disease state-dependent dispersal. *Ecol.*  
455 *Complex.* 21: 1–13.
- 456 Iritani, R. & Iwasa, Y. 2014. Parasite infection drives the evolution of state-dependent dispersal of the host.  
457 *Theor. Popul. Biol.* 92: 1–13.
- 458 Jr, D.J.F. & Weisberg, S. 2018. *An R Companion to Applied Regression*, 3 edizione. SAGE Publications, Inc, Los  
459 Angeles.
- 460 Kamo, M. & Boots, M. 2006. The evolution of parasite dispersal, transmission, and virulence in spatial host  
461 populations. *Evol. Ecol. Res.* 8: 1333–1347.
- 462 Kim, K.W. 2000. Dispersal behaviour in a subsocial spider: group conflict and the effect of food availability.  
463 *Behav. Ecol. Sociobiol.* 48: 182–187.
- 464 Kindvall, O. & Petersson, A. 2000. Consequences of modelling interpatch migration as a function of patch  
465 geometry when predicting metapopulation extinction risk. *Ecol. Model.* 129: 101–109.
- 466 Kruuk, L.E.B., Clutton-Brock, T.H., Slate, J., Pemberton, J.M., Brotherstone, S. & Guinness, F.E. 2000.  
467 Heritability of fitness in a wild mammal population. *Proc. Natl. Acad. Sci.* 97: 698–703. National  
468 Academy of Sciences.
- 469 Kubisch, A., Holt, R.D., Poethke, H.-J. & Fronhofer, E.A. 2014. Where am I and why? Synthesizing range biology  
470 and the eco-evolutionary dynamics of dispersal. *Oikos* 123: 5–22.
- 471 Laitinen, R.A.E. & Nikoloski, Z. 2019. Genetic basis of plasticity in plants. *J. Exp. Bot.* 70: 739–745.
- 472 Lawrence, W.S. 1987. Dispersal: an alternative mating tactic conditional on sex ratio and body size. *Behav.*  
473 *Ecol. Sociobiol.* 21: 367–373.



- 474 Lawrence, W.S. 1988. Movement Ecology of the Red Milkweed Beetle in Relation to Population Size and  
475 Structure. *J. Anim. Ecol.* 57: 21–35. [Wiley, British Ecological Society].
- 476 Lion, S., van Baalen, M. & Wilson, W.G. 2006. The evolution of parasite manipulation of host dispersal. *Proc.*  
477 *R. Soc. B Biol. Sci.* 273: 1063–1071. Royal Society.
- 478 Lopes, P.C. 2014. When is it socially acceptable to feel sick? *Proc. R. Soc. B Biol. Sci.* 281: 20140218. Royal  
479 Society.
- 480 Lopes, P.C., Block, P. & König, B. 2016. Infection-induced behavioural changes reduce connectivity and the  
481 potential for disease spread in wild mice contact networks. *Sci. Rep.* 6: 31790. Nature Publishing  
482 Group.
- 483 Martini, X., Hoffmann, M., Coy, M.R., Stelinski, L.L. & Pelz-Stelinski, K.S. 2015. Infection of an Insect Vector  
484 with a Bacterial Plant Pathogen Increases Its Propensity for Dispersal. *PLoS ONE* 10.
- 485 Massot, M. & Clobert, J. 1995. Influence of maternal food availability on offspring dispersal. *Behav. Ecol.*  
486 *Sociobiol.* 37: 413–418.
- 487 May, R.M. & Anderson, R.M. 1983. Epidemiology and genetics in the coevolution of parasites and hosts. *Proc.*  
488 *R. Soc. Lond. B Biol. Sci.* 219: 281–313.
- 489 Mayer, M., Brown, G.P., Zimmermann, B. & Shine, R. 2015. High infection intensities, but negligible fitness  
490 costs, suggest tolerance of gastrointestinal nematodes in a tropical snake. *Austral Ecol.* 40: 683–692.
- 491 McElroy, E.J. & Buron, I. de. 2014. Host Performance as a Target of Manipulation by Parasites: A Meta-  
492 Analysis. *J. Parasitol.* 100: 399–410. American Society of Parasitologists.
- 493 McFarlane, S.E., Gorrell, J.C., Coltman, D.W., Humphries, M.M., Boutin, S. & McAdam, A.G. 2014. Very low  
494 levels of direct additive genetic variance in fitness and fitness components in a red squirrel  
495 population. *Ecol. Evol.* 4: 1729–1738.
- 496 Mideo, N. 2009. Parasite adaptations to within-host competition. *Trends Parasitol.* 25: 261–268.
- 497 Morrissey, M.B., Villemereuil, P. de, Doligez, B. & Gimenez, O. 2014. *Bayesian approaches to the quantitative*  
498 *genetic analysis of natural populations*. Oxford University Press.
- 499 Mousseau, T.A. & Roff, D.A. 1987. Natural selection and the heritability of fitness components. *Heredity* 59  
500 (Pt 2): 181–197.
- 501 Narayanan, N., Binning, S.A. & Shaw, A.K. 2020. Infection state can affect host migratory decisions. *Oikos* 00:  
502 1–11.
- 503 Nelson, F.B.L., Brown, G.P., Dubey, S. & Shine, R. 2015. The Effects of a Nematode Lungworm (*Rhabdias hylae*)  
504 on its Natural and Invasive Anuran Hosts. *J. Parasitol.* 101: 290–296. American Society of  
505 Parasitologists.
- 506 Nørgaard, L.S., Phillips, B.L. & Hall, M.D. 2019. Infection in patchy populations: Contrasting pathogen invasion  
507 success and dispersal at varying times since host colonization. *Evol. Lett.* 3: 555–566.

- 508 Nørgaard, L.S., Zilio, G., Saade, C., Gougat-Barbera, C., Hall, M.D., Fronhofer, E.A., *et al.* 2020. An evolutionary  
509 trade-off between parasite virulence and dispersal at experimental invasion fronts. *bioRxiv*  
510 2020.01.31.928150. Cold Spring Harbor Laboratory.
- 511 Otsuki, H. & Yano, S. 2014. Predation risk increases dispersal distance in prey. *Naturwissenschaften* 101: 513–  
512 516.
- 513 Parmesan, C. & Yohe, G. 2003. A globally coherent fingerprint of climate change impacts across natural  
514 systems. *Nature* 421: 37–42. Nature Publishing Group.
- 515 Pennekamp, F., Schtickzelle, N. & Petchey, O.L. 2015. BEMOVI, software for extracting behavior and  
516 morphology from videos, illustrated with analyses of microbes. *Ecol. Evol.* 5: 2584–2595.
- 517 Phillips, B.L., Brown, G.P., Webb, J.K. & Shine, R. 2006. Invasion and the evolution of speed in toads. *Nature*  
518 439: 803–803.
- 519 Pigliucci, M. 2005. Evolution of phenotypic plasticity: where are we going now? *Trends Ecol. Evol.* 20: 481–  
520 486.
- 521 Poethke, H.J. & Hovestadt, T. 2002. Evolution of density–and patch–size–dependent dispersal rates. *Proc. R.*  
522 *Soc. Lond. B Biol. Sci.* 269: 637–645. Royal Society.
- 523 Poethke, H.J., Weisser, W.W. & Hovestadt, T. 2010. Predator-Induced Dispersal and the Evolution of  
524 Conditional Dispersal in Correlated Environments. *Am. Nat.* 175: 577–586. The University of Chicago  
525 Press.
- 526 R Core Team (2020). R: A language and environment for statistical computing. R Foundation for Statistical  
527 Computing, Vienna, Austria. URL <https://www.R-project.org/>.
- 528 Restif, O. & Kaltz, O. 2006. Condition-dependent virulence in a horizontally and vertically transmitted  
529 bacterial parasite. *Oikos* 114: 148–158.
- 530 Risely, A., Klaassen, M. & Hoyer, B.J. 2018. Migratory animals feel the cost of getting sick: A meta-analysis  
531 across species. *J. Anim. Ecol.* 87: 301–314.
- 532 Rodrigues, A.M.M. & Johnstone, R.A. 2014. Evolution of positive and negative density-dependent dispersal.  
533 *Proc. R. Soc. B Biol. Sci.* 281: 20141226. Royal Society.
- 534 Roland, J., Keyghobadi, N. & Fownes, S. 2000. Alpine Parnassius Butterfly Dispersal: Effects of Landscape and  
535 Population Size. *Ecology* 81: 1642–1653.
- 536 Ronce, O. 2007. How Does It Feel to Be Like a Rolling Stone? Ten Questions About Dispersal Evolution. *Annu.*  
537 *Rev. Ecol. Evol. Syst.* 38: 231–253.
- 538 Ronce, O., Olivieri, I., Clobert, J. & Danchin, E. 2001. Perspectives on the Study of Dispersal Evolution.  
539 *Dispersal*.
- 540 Saastamoinen, M., Bocedi, G., Cote, J., Legrand, D., Guillaume, F., Wheat, C.W., *et al.* 2018. Genetics of  
541 dispersal. *Biol. Rev.* 93: 574–599.

- 542 Salles, O.C., Almany, G.R., Berumen, M.L., Jones, G.P., Saenz-Agudelo, P., Srinivasan, M., *et al.* 2020. Strong  
543 habitat and weak genetic effects shape the lifetime reproductive success in a wild clownfish  
544 population. *Ecol. Lett.* 23: 265–273.
- 545 Shaw, A.K. & Binning, S.A. 2016. Migratory Recovery from Infection as a Selective Pressure for the Evolution  
546 of Migration. *Am. Nat.* 187: 491–501. The University of Chicago Press.
- 547 Skoblo, I.I., Lebedeva, N.A. & Rodionova, G.V. 1996. The formation of the Paramecium-Holospora symbiotic  
548 system: a study of the compatibility of different symbiont isolates and host clones. *Eur. J. Protistol.*  
549 32: 147–152.
- 550 Stamp, M.A. & Hadfield, J.D. 2020. The relative importance of plasticity versus genetic differentiation in  
551 explaining between population differences; a meta-analysis. *Ecol. Lett.*  
552 <https://doi.org/10.1111/ele.13565>
- 553 Stamps, J.A., Buechner, M. & Krishnan, V.V. 1987. The Effects of Edge Permeability and Habitat Geometry on  
554 Emigration from Patches of Habitat. *Am. Nat.* 129: 533–552. [University of Chicago Press, American  
555 Society of Naturalists].
- 556 Stirling, D.G., Réale, D. & Roff, D.A. 2002. Selection, structure and the heritability of behaviour. *J. Evol. Biol.*  
557 15: 277–289.
- 558 Stroeymeyt, N., Grasse, A.V., Crespi, A., Mersch, D.P., Cremer, S. & Keller, L. 2018. Social network plasticity  
559 decreases disease transmission in a eusocial insect. *Science* 362: 941–945. American Association for  
560 the Advancement of Science.
- 561 Suhonen, J., Honkavaara, J. & Rantala, M.J. 2010. Activation of the immune system promotes insect dispersal  
562 in the wild. *OECOLOGIA* 162: 541–547.
- 563 Taggart, P.L., Leu, S.T., Spiegel, O., Godfrey, S.S., Sih, A. & Bull, C.M. 2018. Endure your parasites: Sleepy Lizard  
564 (*Tiliqua rugosa*) movement is not affected by their ectoparasites. *Can. J. Zool.* 96: 1309–1316.
- 565 Taylor, T.B. & Buckling, A. 2011. Selection experiments reveal trade-offs between swimming and twitching  
566 motilities in *Pseudomonas aeruginosa*. *Evolution* 65: 3060–3069.
- 567 Thomas, C.D., Cameron, A., Green, R.E., Bakkenes, M., Beaumont, L.J., Collingham, Y.C., *et al.* 2004. Extinction  
568 risk from climate change. *Nature* 427: 145–148. Nature Publishing Group.
- 569 Thomas, F., Schmidt-Rhaesa, A., Martin, G., Manu, C., Durand, P. & Renaud, F. 2002. Do hairworms  
570 (Nematomorpha) manipulate the water seeking behaviour of their terrestrial hosts? *J. Evol. Biol.* 15:  
571 356–361.
- 572 Weigensberg, I. & Roff, D.A. 1996. Natural heritabilities: can they be reliably estimated in the laboratory?  
573 *Evol. Int. J. Org. Evol.* 50: 2149–2157.
- 574 Weiss-Lehman, C., Hufbauer, R.A. & Melbourne, B.A. 2017. Rapid trait evolution drives increased speed and  
575 variance in experimental range expansions. *Nat. Commun.* 8: 1–7.

576 Welicky, R.L. & Sikkel, P.C. 2015. Decreased movement related to parasite infection in a diel migratory coral  
577 reef fish. *Behav. Ecol. Sociobiol.* 69: 1437–1446.

578 Wichterman, R. 2012. *The Biology of Paramecium*. Springer Science & Business Media.

579 Zilio, G., Nørgaard, L.S., Gougat-Barbera, C., Hall, M.D., Fronhofer, E.A. & Kaltz, O. 2020. Travelling with a  
580 parasite: the evolution of resistance and dispersal syndrome during experimental range expansion.  
581 *bioRxiv* 2020.01.29.924498. Cold Spring Harbor Laboratory.

582

583

584

585

586

587

588

589

590

591

592

593

594

595

596

597

598

599

600

601

602

603

604

605

606

607

608 **Figures**

609

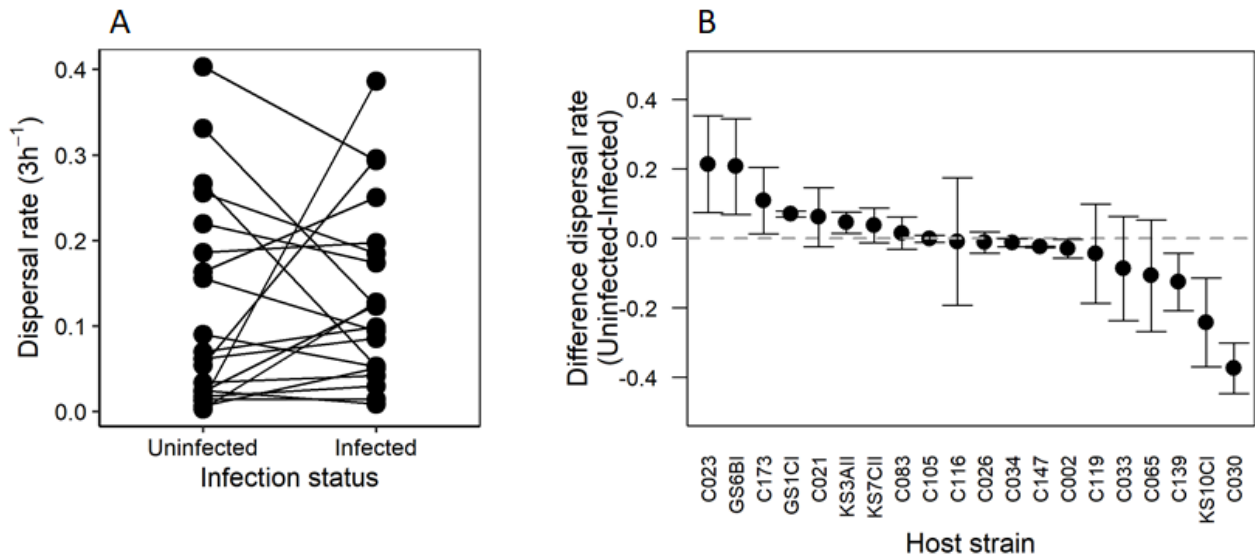

610

611 **Figure 1.** (A) State-dependent dispersal of infected and uninfected host strains. Each point represent the mean dispersal  
 612 value of a specific strain, the lines connect the the two infection status of the same strain. (B) Difference in dispersal  
 613 rate between uninfected and infected populations. On the vertical axis is the difference between the mean percentage  
 614 of dispersal in the uninfected and the infected group for each strain (black points  $\pm$  SE). Strains with mean values above  
 615 0 (dashed grey line) have higher dispersal when uninfected, whereas strains with mean values below 0 have higher  
 616 dispersal when infected.

617

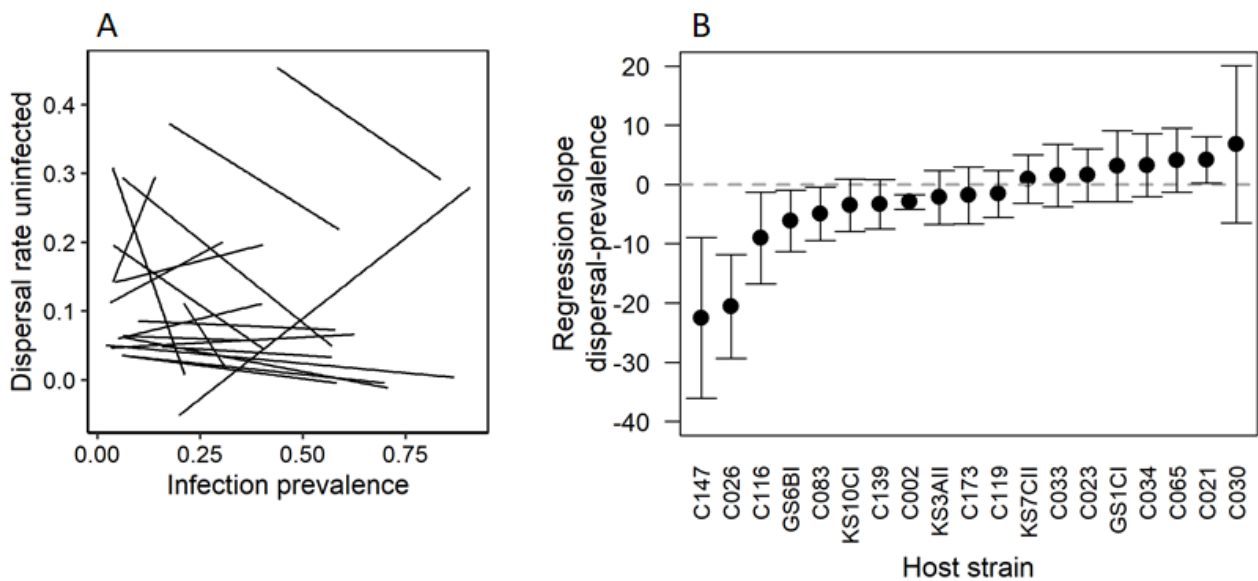

618

619 **Figure 2.** (A) Context-dependent dispersal of uninfected host strains in response to different level of parasite infection  
 620 prevalence in the population. Regression lines are calculated separately for each strain, (B) Slopes from the model for  
 621 each strain calculated in logit (black point  $\pm$  SE). Positive or negative slopes (above or below 0, dashed grey line), indicate  
 622 a higher or lower dispersal in response to increasing presence of infected hosts.

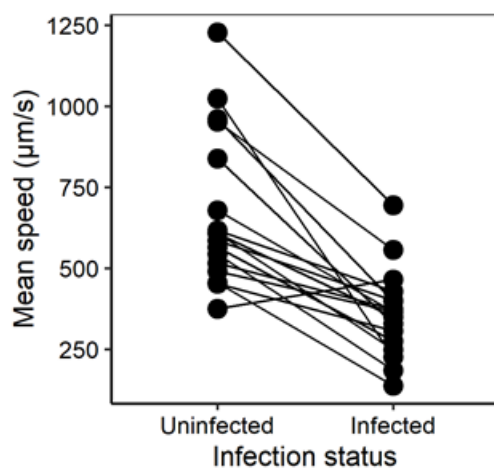

623

624 **Figure 3.** Swimming speed of infected and uninfected strains of *P. caudatum*. Each point represents the mean speed per  
625 strain, the line connects the different infection status for each strain.

626

627

628

629

630

631

632

633

634

635

636

637

638

639

640

641

642

643

644

645

646

647



648 **Supplementary Information**

649

650 **Table S1.** Host strain identity, country of origin and infection prevalence (number of infected individuals) at day 4 post  
651 inoculation.

| <b>Strain</b> | <b>Country</b> | <b>Day 4<br/>infection prevalence</b> |
|---------------|----------------|---------------------------------------|
| C002          | Germany        | 0.73                                  |
| C021          | Germany        | 0.87                                  |
| C023          | Germany        | 0.66                                  |
| C026          | USA, Louisiana | 0.62                                  |
| C030          | Austria        | 0.81                                  |
| C033          | China          | 0.2                                   |
| C034          | Germany        | 0.39                                  |
| C065          | Sweden         | 0.23                                  |
| C083          | USA, Indiana   | 0.18                                  |
| C105          | Spain          | 0.14                                  |
| C116          | France         | 0.57                                  |
| C119          | Peru           | 0.89                                  |
| C139          | Japan          | 0.32                                  |
| C147          | Japan          | 0.56                                  |
| C173          | Greece         | 0.73                                  |
| GS1CI         | Germany        | 0.67                                  |
| GS6BI         | Germany        | 0.81                                  |
| KS10CI        | Germany        | 0.76                                  |
| KS3AII        | Germany        | 0.81                                  |
| KS7CII        | Germany        | 0.74                                  |

652

653

654

655

656

657

658

659

660

661 **Table S2.** ANOVA results from GLMM models for (a) state- and (b) context-dependent dispersal. Block was always  
 662 included as random factor.

| <b>(a) State-dependent dispersal</b>   |  |             |          |            |
|----------------------------------------|--|-------------|----------|------------|
| <i>Random effect:</i>                  |  | Var±SD:     |          |            |
| Block                                  |  | 0.07±0.26   |          |            |
| <i>Fixed effects:</i>                  |  | <i>d.f.</i> | $\chi^2$ | p          |
| Strain                                 |  | 19          | 133.2    | <0.001 *** |
| Infection status                       |  | 1           | 2.9      | 0.086 .    |
| Strain x Infection status              |  | 19          | 64.7     | <0.001 *** |
| <b>(b) Context-dependent dispersal</b> |  |             |          |            |
| <i>Random effect:</i>                  |  | Var±SD:     |          |            |
| Block                                  |  | 0±0         |          |            |
| <i>Fixed effects:</i>                  |  | <i>d.f.</i> | $\chi^2$ | p          |
| Strain                                 |  | 18          | 94.7     | <0.001 *** |
| Infection prevalence                   |  | 1           | 0.9      | 0.348      |
| Population density                     |  | 1           | 0.5      | 0.497      |
| Strain x Infection prevalence          |  | 18          | 28.9     | 0.049 *    |

663

664

665 **Table S3.** ANOVA results from linear models analysing swimming behaviour, (a) speed, (b) tortuosity and (c) their  
 666 correlation with dispersal.

| <b>(a) Speed</b>      |             |      |        |     |
|-----------------------|-------------|------|--------|-----|
|                       | <i>d.f.</i> | F    | p      |     |
| Strain                | 16          | 2.4  | 0.038  | *   |
| Infection status      | 1           | 39.9 | <0.001 | *** |
| <b>(b) Tortuosity</b> |             |      |        |     |
|                       | <i>d.f.</i> | F    | p      |     |
| Strain                | 16          | 0.44 | > 0.5  |     |
| Infection status      | 1           | 0.06 | > 0.5  |     |
| <b>(c) Dispersal</b>  |             |      |        |     |
|                       | <i>d.f.</i> | F    | p      |     |
| Speed                 | 1           | 0.8  | 0.373  |     |
| Tortuosity            | 1           | 0.2  | > 0.5  |     |

667
